# Supplementary material for: An Epigenetic Feedback Regulatory Loop Involving MicroRNA-195 and MBD1 Governs Neural Stem Cell Differentiation
Source: PubMed Central journal article supplement (PMC3547917; doi:10.1371/journal.pone.0051436), 2013-01-17
Supplement: pone.0051436.s001.pdf [file pone.0051436.s001.pdf]

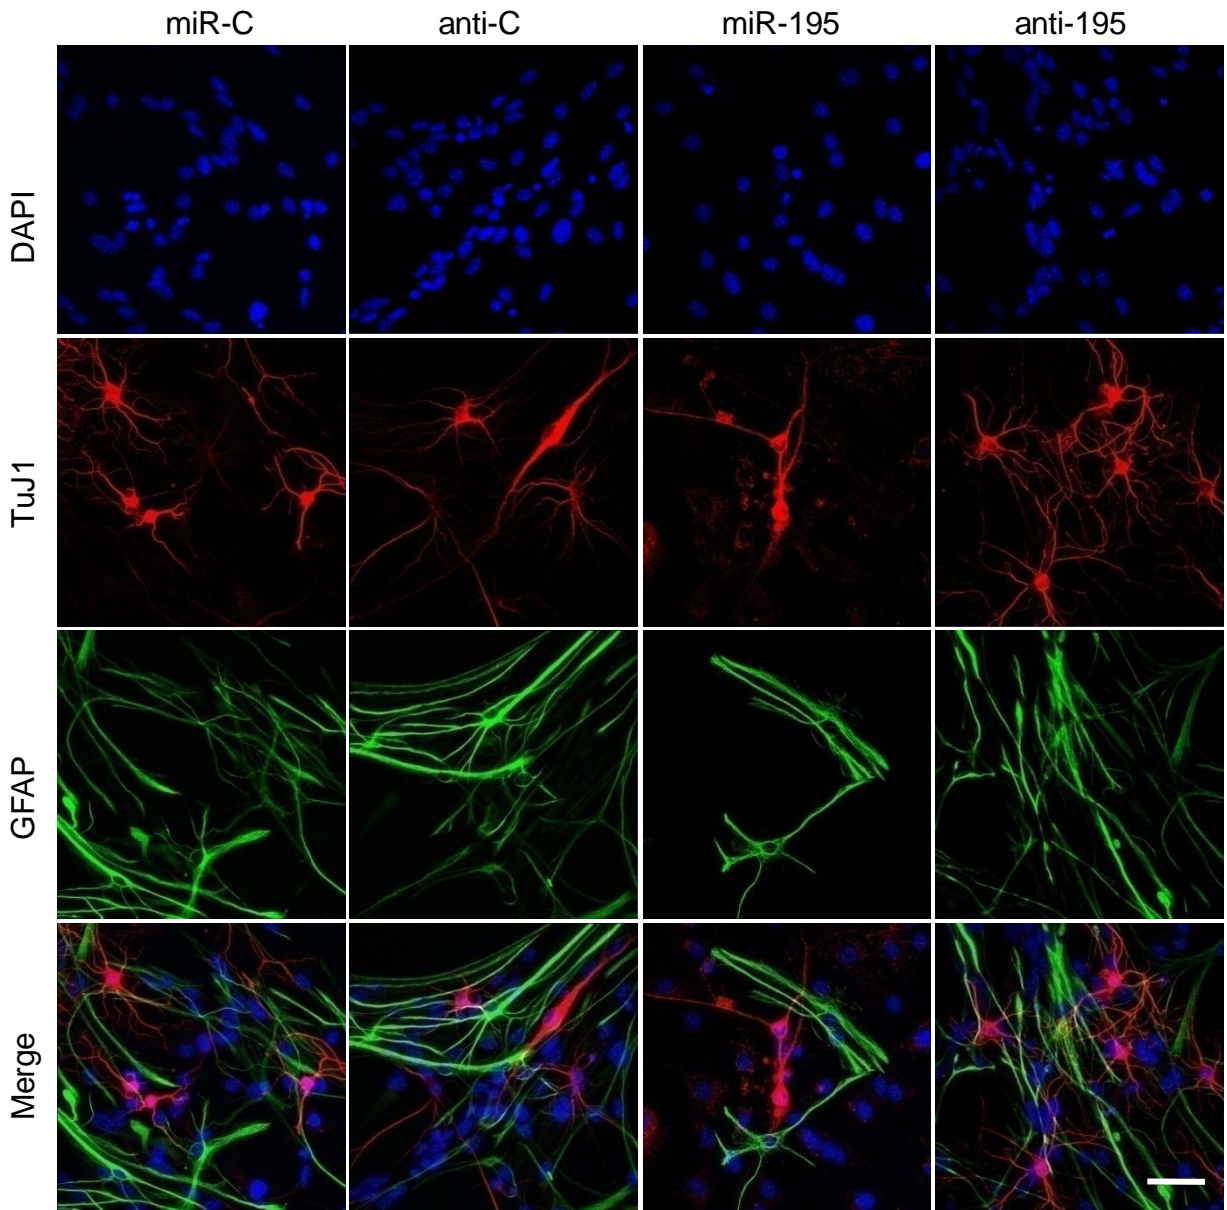

**Figure S1.** High levels of miR-195 inhibits aNSC differentiation.

Representative images of DG-aNSCs transfected with either miR-195 or an inhibitor for miR-195 (anti-195) that have undergone differentiation. miR-195-transfected aNSCs had reduced GFAP+ astrocytes and TuJ1+ neurons, compared to control miR-C-treated cells. Anti-195-transfected NSCs displayed increased GFAP+ astrocytes and TuJ1+ neurons relative to control anti-C-treated cells. Neuronal lineage marker TuJ1 (red) and astrocyte lineage marker GFAP (green) were used to assess differentiation. DAPI, blue. (Scale bar = 50  $\mu$ m).

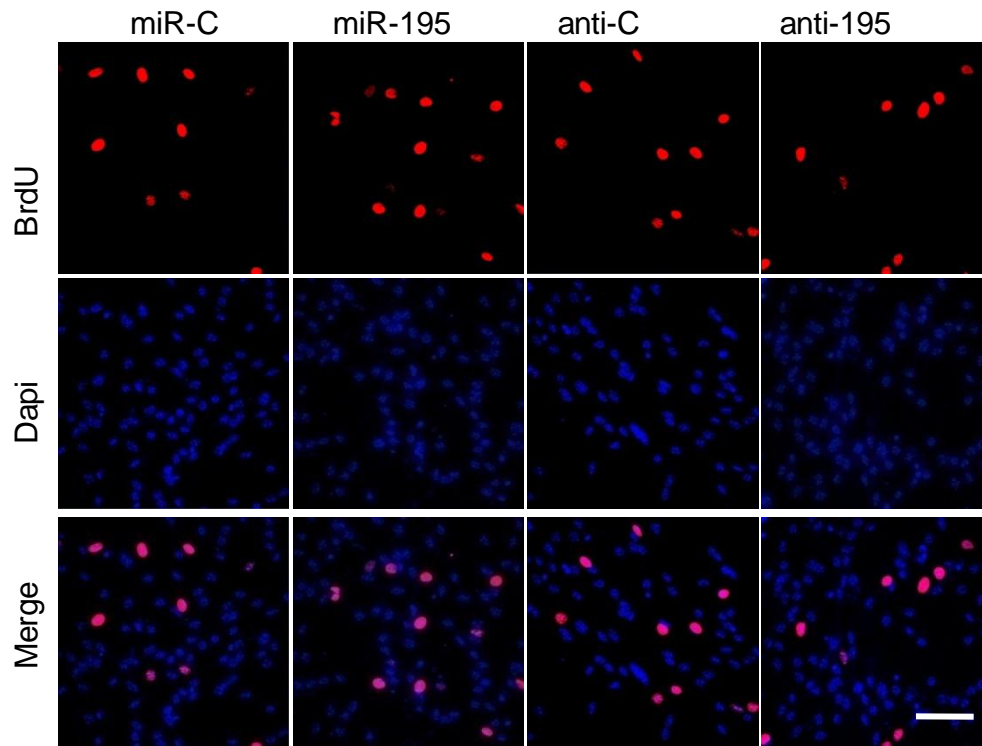

**Figure S2.** High levels of miR-195 promotes aNSC proliferation. Representative images of DG-aNSCs transfected with either miR-195 or an inhibitor for miR-195 (anti-195) that have been subjected to BrdU pulse-labeling for proliferation analysis. miR-195-transfected aNSCs had increased BrdU labeling, compared to control miR-C-treated cells. Anti-195-transfected NSCs displayed decreased BrdU labeling relative to control anti-C-treated cells. BrdU, red. DAPI, blue. (Scale bar = 50  $\mu$ m).

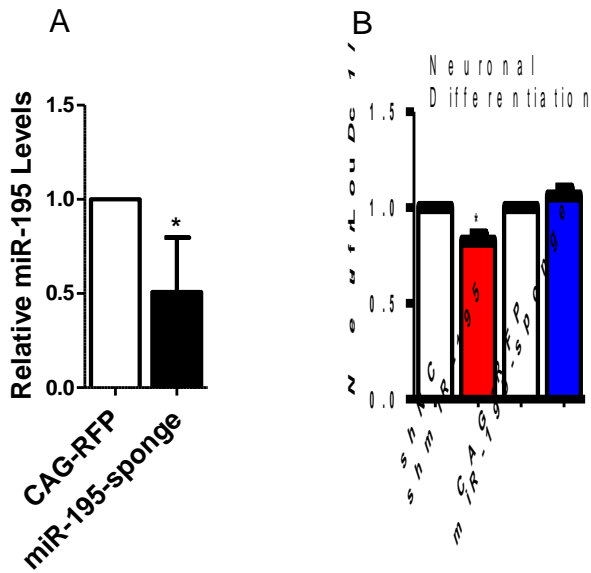

**Figure S3.** Assessment of viral expressed miR-195 and miR-195 sponge.

(A). DG-aNSCs infected with retrovirus expressing miR-195-sponge exhibited reduced mature miR-195 levels compared to control CAG-RFP virus-infected cells (n=5, p<0.05).

(B) Overexpression of retrovirus-shmiR-195 (used in Fig.3) in WT aNSCs resulted in reduced aNSC neuronal differentiation (n=4, p<0.05) and overexpression of retrovirus-miR-195-sponge (used in Fig. 3) led to slight increase (n=4, p=0.18) in aNSC neuronal differentiation as assessed by *NeuroD1* promoter activities

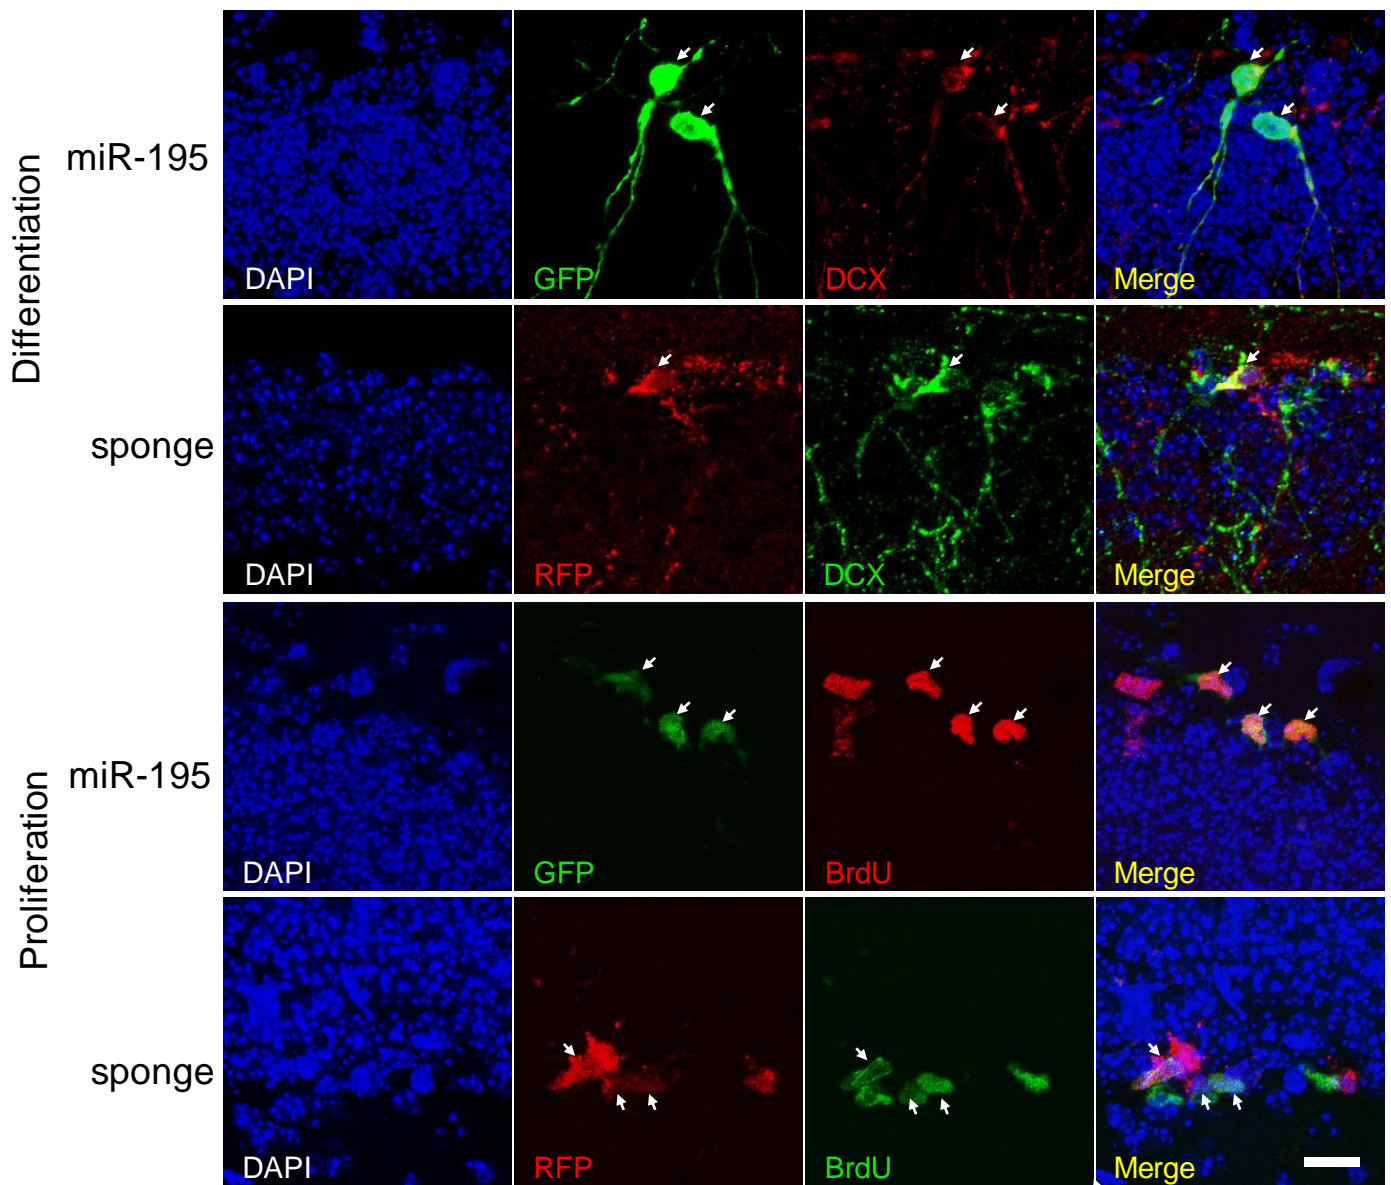

**Figure S4. miR-195 modulates the differentiation of adult NSCs *in vivo***

Representative images of retrovirus-infected cells analyzed by cell proliferation and neuronal differentiation markers at 1 week post-viral grafting. (Scale bar = 10  $\mu$ m).

Sh-miR-195 retrovirus-infected cells also expressed GFP (green). DCX or BrdU, red. DAPI, blue.

miR-195-sponage virus-infected cells also expressed RFP (red). DCX or BrdU, green, DAPI, blue.

Arrows indicates double labeled cells.

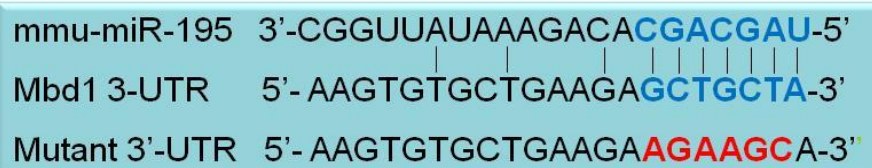

Figure S5. A miR-195 target site was found in the *Mbd1* 3' untranslated region (3' UTR) as predicted by TargetScan software. To determine whether miR-195 repressed MBD1 translation through this target site, a mutant *Mbd1* 3'UTR construct was created by mutating the seed sequence (nucleotides in blue) within the *Mbd1* 3'UTR (mutant nucleotides are in red).

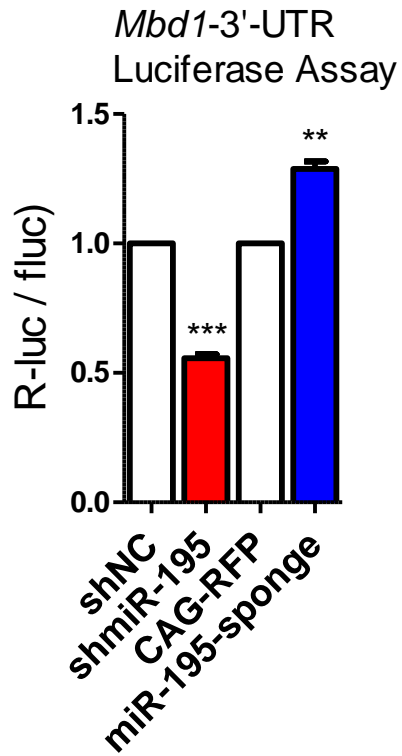

**Figure S6** *Mbd1*-3'-UTR-dependent expression of Renilla luciferase reporter gene (R-Luc) was suppressed by retrovirus-shmiR-195 and enhanced by the retrovirus-miR-195-sponge in aNSCs (n=4,p<0.01).

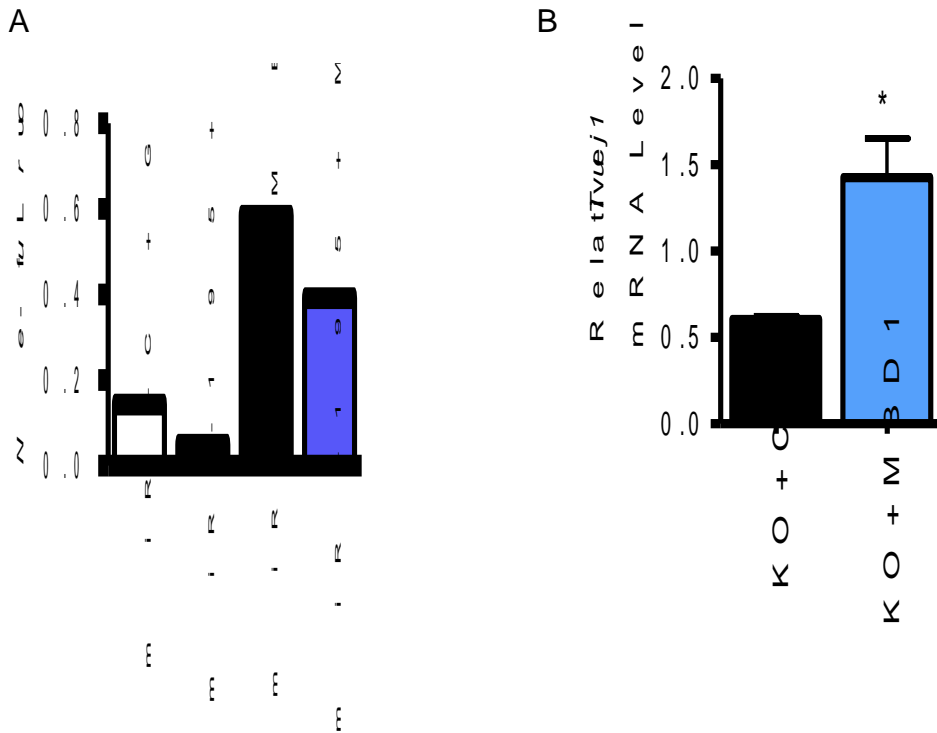

**Figure S7. MBD1 rescues neuronal differentiation deficits resulted from either miR-195 overexpression or MBD1 deficiency.** (A). MBD1 rescues miR-195 overexpression-induced neuronal differentiation deficits (data is an average of one experiment with 3 replicates). (B) Exogenous MBD1 could rescue neuronal differentiation deficits exhibited by *Mbd1* KO aNSCs as assessed by *Tuj1* mRNA expression in differentiating aNSCs (D, n = 4).rescues neuronal differentiation deficits of MBD1 KO NSCs (n=4-6). Data are presented as mean  $\pm$  SEM; statistics were done using one-sample t-test\*, p < 0.05, \*\*, p < 0.01.

**Table S1. Predicted targets of miR-195 by TargetScan and miRanda program**

|          |    |           |
|----------|----|-----------|
| MBD1     | ↓  | ↓         |
| EphA7    | ↓  | NA        |
| Wee1     | ↓  | NA        |
| Mib1     | ↓  | NA        |
| BDNF     | ↓  | NA        |
| CyclinD1 | NA | No change |
| Sox5     | NA | NA        |
| NOVA1    | NA | NA        |
| FoxJ1    | NA | NA        |
| Wnt3a    | NA | NA        |
| Nrg1     | NA | NA        |
| Reln     | NA | NA        |
|          |    |           |

Note: down arrow indicates that miR-195 repressed the luciferase activity through the 3'UTR of indicated target mRNA. No Change, transfected miR-195 did not affect the expression of this protein. NA, Not analyzed.
